# Supplementary material
Source: publisher figshare collection journal article supplement (https://acs.figshare.com/ndownloader/files/5067232)
Supplement: Supplementary file 1 [file 5067232]

# Supporting Information

## Gold Nanoparticle-Enhanced Secondary Ion Mass Spectrometry Imaging of Peptides on Self-Assembled Monolayers

Young-Pil Kim,<sup>†</sup> Eunkeu Oh,<sup>†</sup> Mi-Young Hong,<sup>†</sup> Dohoon Lee,<sup>†</sup> Min-Kyu Han,<sup>†</sup> Hyun Kyong  
Shon,<sup>‡</sup> Dae Won Moon,<sup>‡</sup> Hak-Sung Kim,<sup>\*,†</sup> and Tae Geol Lee<sup>\*,‡</sup>

<sup>†</sup>Department of Biological Sciences, Korea Advanced Institute of Science and  
Technology (KAIST), Daejeon 305-701, Korea

<sup>‡</sup>Nano-Surface Group, Korea Research Institute of Standards and Science (KRISS),  
Daejeon 305-600, Korea

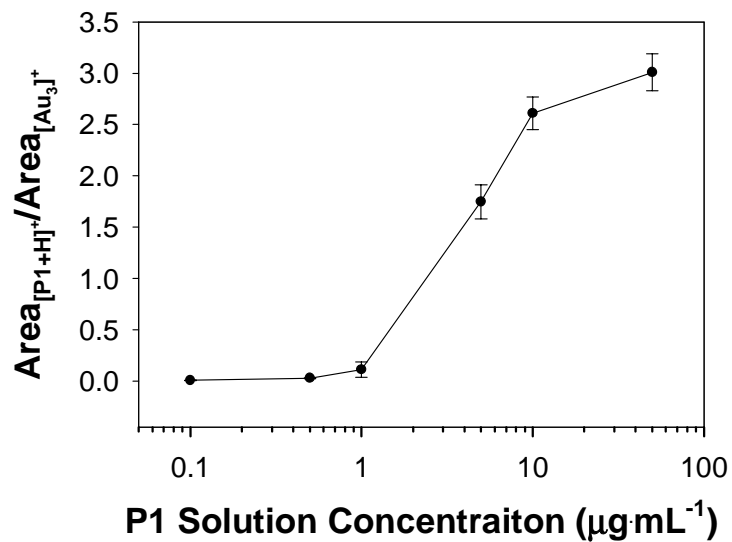

**Figure S1.** Change in the SIMS intensity ratio of  $[\text{P1+H}]^+$  to  $[\text{Au}_3]^+$  as a function of P1 peptide solution concentration on Si/APTES/AuNPs. Secondary ion intensity at  $m/z$   $[\text{Au}_3]^+$  decreased with increasing P1 concentration, whereas secondary ion intensity at  $m/z$   $[\text{P1+H}]^+$  increased with increasing P1 concentration. Peptides with different concentrations were adsorbed on the same surface for 1 h at room temperature.

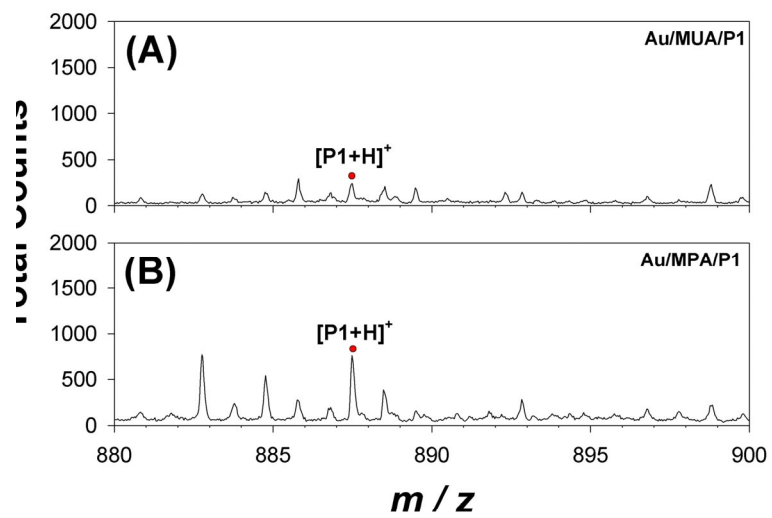

**Figure S2.** P1 peptide ions generation between two carboxy SAMs with different lengths in their alkane chains.

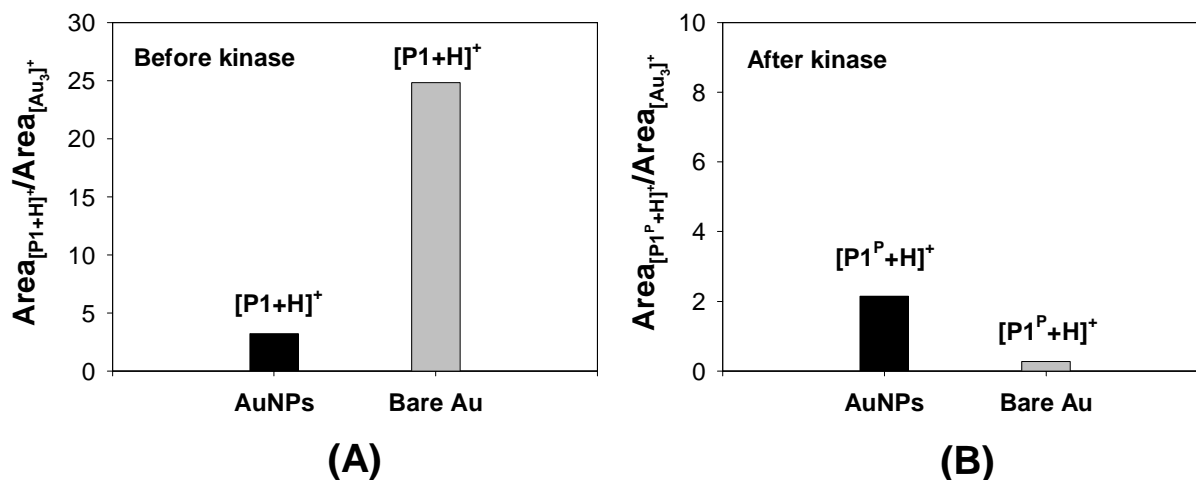

**Figure S3.** Secondary ion emission of peptides on SAMs/AuNPs and on bare gold (A) before and (B) after kinase reaction. In contrast to non-phosphorylated ion  $[P1+H]^+$ , phosphorylated ion signal  $[P1^P+H]^+$  by kinase reaction was higher on the SAMs/AuNPs assembly than on bare gold. To compare the normalized intensity, the peak area of peptide ion was divided by the peak area of gold ion  $[Au_3]^+$  on the same surface. For the kinase reaction, the peptide-adsorbed AuNPs/SAM and bare gold surface were incubated for 2 h at 30 °C with a mixture of Abl kinase (Calbiochem Inc., 2 U· $\mu\text{L}^{-1}$ ), ATP (150  $\mu\text{M}$ ), and  $\text{MgCl}_2$  (30 mM) in a reaction buffer (50 mM Tris pH 7.5, containing 0.05 mM EDTA, 1mM DTT, 0.015 % Tween-20, 0.1 mg· $\text{mL}^{-1}$  BSA).
